# Supplementary material
Source: HighWire-hosted journal article supplement (https://bmjopenquality.bmj.com/highwire/filestream/136146/field_highwire_adjunct_files/0/ds3668.pdf)

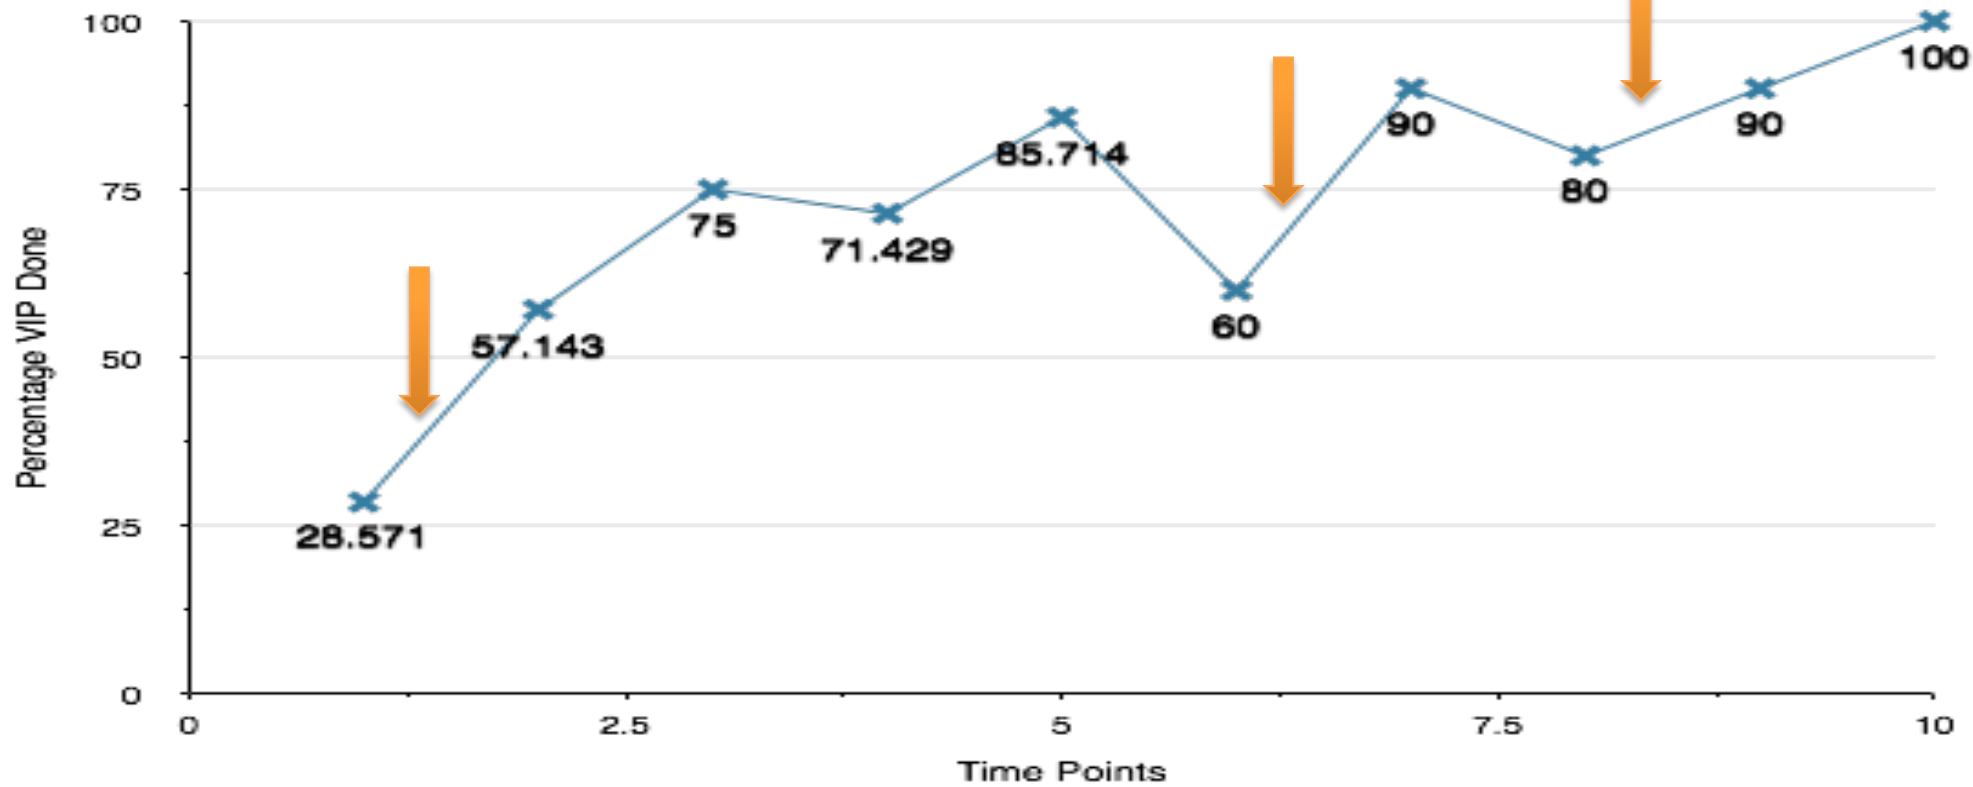

Supplement: ds3668.pdf [file ds3668.pdf]
